# Supplementary material
Source: publisher figshare collection journal article supplement (https://gsapubs.figshare.com/ndownloader/files/28417914)
Supplement: Supplementary file 1 [file 28417914]

## Sheet: Table S2
This Supplemental Material accompanies Redwine, J.R., and
Adams, K.D., 2021, A 740,000-yr-long Mohawk Lake record,
Mohawk Valley, northeastern California, USA, in Starratt, S.W.,
and Rosen, M.R., eds., From Saline to Freshwater: The Diversity
of Western Lakes in Space and Time: Geological Society
of America Special Paper 536, https://doi.org/10.1130/2021.2536(21)
Table S2. Soil Descriptions in Mohawk Valley
Site No., location, elevation, geomorphic surface, parent materials, age estimate	Depth	*Horizon	Matrix		Structure	Gravel	Consistence			Texture	Clay	Clay films		Oxidation	Reduced Matrix		Redoximorphic features		†SiO2	Cementation	Roots	Pores	Lower
	(cm)		moist color	dry color		(visual %)	Wet	Moist	Dry		films	moist color	dry color	films	moist color	dry color	moist color	dry color	stage				boundary
Moraines
Site MV-08 - upper soil	0-20	Bw	10YR 3/3	10YR 6/3	2fsbk - 2fgr	20	sps	sh	vfr	SCL	N.R.	N.A.	N.A.	none	N.A.	N.A.	N.A.	N.A.	none	none	N.R.	N.R.	cs
Frazier Falls Road near intersection with Gold Lake Highway	20-46	Bt1	10YR 4/4	10YR 7/4	2m-fsbk	30	ssp	sh	vfr	SCL	2dpf	7.5YR 4/4	7.5YR 7/4	none	N.A.	N.A.	N.A.	N.A.	none	none	N.R.	N.R.	cs
1498 m	46-71	Bt2	10YR 5/4	10YR 7/4	2m-fsbk	30	ssp	sh	vfr	SCL (CL?)	3dpf	7.5YR 5/4	7.5YR 6/3	none	N.A.	N.A.	N.A.	N.A.	none	none	N.R.	N.R.	cs
moraine											1ppf	5YR 6/6	5YR 6/4	none
till	71-96	Bt3	N.R.	10YR 6/4	2m-fsbk	30	sp	h	vfr	SCL	3ppf	N.R.	5YR 6/4	none	N.A.	N.A.	N.A.	N.A.	none	none	N.R.	N.R.	cs
≥600-400 ka	96-131	Bt4	10YR 5/4	10YR 7/4	2m-fsbk	30	ssp	sh	vfr	SCL	3ppf	5YR 5/6	5YR 4/6	none	N.A.	N.A.	N.A.	N.A.	none	none	N.R.	N.R.	as
	131-171+	Bt5	10YR 6/4	10YR 7/4	2msbk	30	ssp	sh	vfr	CL	3dpf	7.5YR 5/8	7.5YR 5/6	none	N.A.	N.A.	N.A.	N.A.	none	none	N.R.	N.R.	N.A.
Site MV-08 - lower soil	0-22	Bt1	10YR 3/3	10YR 6/4	2fsbk	20	sopo	sh	fr	SL	2fpf	10YR 3/3	10YR 6/4	none	N.A.	N.A.	N.A.	N.A.	none	none	N.R.	N.R.	cs
Frazier Falls Road near intersection with Gold Lake Highway	22-60	Bt2	10YR 5/4	10YR 7/6	N.R.	30	ssps	sh	vfr	SCL (SL?)	3fpf	10YR 5/4	10YR 7/6	none	N.A.	N.A.	N.A.	N.A.	none	none	N.R.	N.R.	cs
1489 m	60-105	Bt3	10YR 4/4	10YR 7/6	2fsbk	30-50	sps	sh	vfr	SCL	3fpf	10YR 4/4	10YR 6/6	none	N.A.	N.A.	N.A.	N.A.	none	none	N.R.	N.R.	cs
moraine	105-197	Bt4	10YR 5/4	10YR 7/6	2msbk	30-50	sps	sh	fr	SCL	3dpf	7.5YR 4/4	7.5YR 5/6	none	N.A.	N.A.	N.A.	N.A.	none	none	N.R.	N.R.	gs
till	197-272	Btqm	10YR 5/3	10YR 6/4	2msbk	30-50	sps	h	h	SCL	3ppf	7.5YR 5/3	7.5YR 4/6	none	N.A.	N.A.	N.A.	N.A.	none	none	N.R.	N.R.	gs
≥600-400 ka	272-342	Bt5	10YR 5/5	10YR 7/4	2csbk	30-50	N.R.	N.R.	N.R.	N.R.	3ppf	7.5YR 5/4	7.5YR 4/4	none	5Y 4/4	5Y 6/4	N.A.	N.A.	none	none	N.R.	N.R.	gs
	342-400	Bt6	10YR 6/4	10YR 7/4	2csbk	30-50	sps	sh	fr	SCL	3ppf	7.5YR 3/4	7.5YR 4/4	none	N.A.	N.A.	N.A.	N.A.	none	none	N.R.	N.R.	gs
	400-427	Bt7	10YR 4/4	10YR 7/4	2msbk	30-50	sps	sh	sr	SCL	3ppf	10YR 3/4	10YR 4/4	none	N.A.	N.A.	N.A.	N.A.	††yes?	none	N.R.	N.R.	N.A.
Site MV-300	0-16	A	10YR 2/2	10YR 4/2	2fsbk	>75	ssps	vfr	so	SL	none	N.A.	none	none	N.A.	N.A.	N.A.	N.A.	none	none	2vf, 1f, 1f, 1m, 1c	none	cs
Frazier Falls Road (N4401774 E703533 )	16-34	Bt1	10YR 4/4	10YR 5/4	2fsbk	25-50	sps	vfr	sh	SCL	none	OM skins	none	none	N.A.	N.A.	N.A.	N.A.	none	none	2vf, 2f, 1m, 1c	1vf, 1f	cs
1584 m	34-52	Bt2	10YR 4/4	10YR 5/4	2msbk	25-50	sp	fr	sh	SCL	3dpf, 2ppf	N.R.	none	none	N.A.	N.A.	N.A.	N.A.	none	none	1vf, 1f, 1m, 1c	2vf, 1f, 1m, 1c	as
moraine (kame terrace?)	52-69	2Bt3	10YR 4/4	10YR 5/4	2msbk	>75	vsvp	fr	h	SCL	3ppf, 2dpf	3ppf - 7.5YR 4/6, 2dpf - 7.5YR 4/4	3ppf - 7.5YR 5/6, 2dpf - 7.5YR 5/4	none	N.A.	N.A.	N.A.	N.A.	none	none	2vf, 2f, 2m, 1c, 1vc	1vf, 1f, 1m	cs
fluvial gravels / till	69-122	2Bt4	10YR 4/4	10YR 5/4	2msbk	>75	vsp	fr	h	SCL	3ppf, 3dpf	3ppf - 5YR 5/6, 3dpf - 7.5YR 3/4	3ppf - 7.5YR 4/6, 3dpf - 7.5YR 4/4	none	N.A.	N.A.	N.A.	N.A.	none	none	1vf, 1f, 1m, 1c, 1vc	2vf, 1f, 1m	cs
< 600-400 ka	122-152	2Bt5	2.5Y 6/6	2.5Y 7/6	2fabk-2msbk	>75	sps	fr	h	SCL	3ppf, 3dpf	3ppf - 5YR 4/6, 3dpf - 7.5YR 4/6	3ppf - 5YR 5/8, 3dpf - 7.5YR 5/4	none	N.A.	N.A.	N.A.	N.A.	none	none	1vf, 1f, 1m	1vf, 1f	gs
	152-195	2Btq1	2.5Y 5/4	2.5Y 6/6	2msbk	>75	sspo	vfi	h	SL	3ppf, 3dpf	3ppf - 5YR 4/6, 3dpf - 5YR 4/6	3ppf - 5YR 5/8, 3dpf - 5YR 4/4	none	N.A.	N.A.	N.A.	N.A.	II?	cm	2vf, 2f, 1m, 1c,1vc	1vf, 1f, 1m	cw
	195-231+	2Btq2	2.5Y 6/4	2.5Y 7/3	2msbk	>75	sopo	efi	vh	SL	2dpf, 1ppf	2dpf - 10YR 5/4, 1ppf - 5YR 5/6	2dpf - 10YR 6/4, 1ppf - 5YR 6/8	none	N.A.	N.A.	N.A.	N.A.	II?	cm	2vf, 1f, 1m	1f, 1m	N.A.
Site MV-296
along Jamison Creek (N4404437 E698377)	0-5	O	2.5Y 3/2	2.5Y 4/3	3fpl	0	sopo	vfr	so	L	none	N.A.	N.A.	none	N.A.	N.A.	N.A.	N.A.	none	none	1vf, 1f, 2c, 2vc	none	as
1397 m	5-13	A	2.5Y 3/2	2.5Y 4/2	1vfgr / sg	10	sopo	vfr	sh	L	none	N.A.	N.A.	none	N.A.	N.A.	N.A.	N.A.	none	none	2vf, 1f, 1m, 1c, 1vc	none	as
moraine (Qmy1)
eolian / till	13-22	Bw1	2.5Y 3/2	2.5Y 4/2	2fsbk	10-25	sopo	vfr	sh	SL	none	N.A.	N.A.	none	N.A.	N.A.	N.A.	N.A.	none	none	2vf, 1f, 1m, v1c	2vf, 2f, 1m, 1c	cs
MIS 2 or 4 ≤~200 ka	22-42	Bw2	10YR 3/2	10YR 4/3	2m to f sbk	25-50	sopo	vfr	sh	SL	none	N.A.	N.A.	none	N.A.	N.A.	N.A.	N.A.	none	none	1vf, 2f, 1m, 1c, 1vc	2vf, 1f, 1m	cs
	42-57	Bt1	10YR 3/3	2.5Y 4/4	2msbk	25-50	sspo	fr	sh	L	none	N.A.	N.A.	none	N.A.	N.A.	N.A.	N.A.	none	none	2vf, 1f, 1m, 1c, 1vc	1vf, 1f, 1m	cs
	57-81	Bt2	2.5Y 3/3	2.5Y 6/3	2msbk	25-50	sspo	vfr	sh	L	none	N.A.	N.A.	none	N.A.	N.A.	N.A.	N.A.	none	none	2vf, 1f, 1m, 1c, 1vc	1f, 1m, 1c	as
	81-140	2Bqmt1	2.5Y 5/3	2.5Y 6/3	m to 2msbk	>75	sspo	efi	eh	SCL	1fpf	2.5Y 6/3	2.5Y 7/3	none	N.A.	N.A.	N.A.	N.A.	III	cs	v1vf	N.R.	gs
	140-165	2Bqmt2	2.5Y 5/3	2.5Y7/2	m to 2msbk	>75	sspo	efi	vh	SL	2ppf	2.5Y 5/4	2.5Y 7/4	none	N.A.	N.A.	N.A.	N.A.	III	cs	N.R.	N.R.	cs
	165-205	2Bqmt3	2.5Y 5/3	2.5Y 8/2	m to 2msbk	>75	sspo	efi	vh	SL	2fpf, 1ppf, 1dpf	2fpf -2.5Y 5/3, 1ppf -2.5Y 4/4, 1dpf - 2.5Y 5/4	2fpf -2.5Y 7/2, 1ppf -2.5Y 5/3, 1dpf -2.5Y 6/4	none	N.A.	N.A.	N.A.	N.A.	III	cs-	v1vf	N.R.	cs
	205-220	2Bqmt4	2.5Y 5/3	2.5Y 6/3	2csbk	>75	sspo	vfi	vh	SL	2fpf	N.R.	N.R.	none	N.A.	N.A.	N.A.	N.A.	II	cm to cw	v1vf	N.R.	cs
	220-240	2Bqm	2.5Y 4/3	2.5Y 7/3	2fsbk / sg	>75	sopo	efi	vh	LS	none	N.A.	N.A.	none	N.A.	N.A.	N.A.	N.A.	II+	cm	v1vf	N.R.	cs
	240-270+	2Cq	2.5Y 4/2	2.5Y 6/2	sg	>75	sopo	lo	lo	S	none	N.A.	N.A.	none	N.A.	N.A.	N.A.	N.A.	none	none	1vf, 1f	N.R.	N/A
Outwash
Site MV-284
	0-5	A	N.R. darker than Bw1		sg	<10	sopo	lo	lo	LS	none	N.A.	N.A.	none	N.A.	N.A.	N.A.	N.A.	none	none	N.R.	none	cs
Outwash from Gray Eagle Creek (N4403434 E703212)	5-15	Bw1	10YR 3/3	10YR 5/3	1fgr	50-75	sspo	so	so	SL	none	N.A.	N.A.	none	N.A.	N.A.	N.A.	N.A.	none	none	1vf, 1f, 1m, 1c, 1vc	none	cs
1389 m	15-36	Bw2	10YR 3/4	10YR 5/4	2msbk	>75	sspo	vfr	sh	SL	none	N.A.	N.A.	none	N.A.	N.A.	N.A.	N.A.	none	none	2vf, 2f, 2m, 1c, v1vc	1vf, 1f	cw
outwash fan	36-50	Bw3	10YR 3/4	10YR 5/4	1msbk	>75	sspo	vfr	so	SL	none	N.A.	N.A.	none	N.A.	N.A.	N.A.	N.A.	none	none	2vf, 2f, 2m, 1c, v1vc	none	cw
eolian/fan gravels	50-75	Bw4	10YR 3/4	10YR 6/4	sg	>75	sopo	lo	lo	SL	none	N.A.	N.A.	none	N.A.	N.A.	N.A.	N.A.	none	none	2vf, 2f, 1m, 1c, v1vc	none	cw
MIS 2?	75-100	Cox1	10YR 4/4	10YR 6/4	sg	>75	sopo	lo	lo	LS	none	N.A.	N.A.	none	N.A.	N.A.	N.A.	N.A.	none	none	2vf, 2f, 1m	none	gs
	100+	Cox2	10YR 4/4	10YR 6/4	sg	75	sopo	lo	lo	LS	none	N.A.	N.A.	none	N.A.	N.A.	N.A.	N.A.	none	none	1vf, 1f	none	n/a
		R
Delta Rim Terrace
Site MV-90
Along Portola Rd. (N4402006 E709476)	0-2	A?	10YR 3/3	10YR 5/3	sg	0	sopo	lo	lo	S	none	N.A.	N.A.	none	N.A.	N.A.	N.A.	N.A.	none	none	N.R.	N.R.	cs
1424 m	2-11	A	10YR 3/3	10YR 4/3	2fsbk	<10	ssps	vfr	sh	SL	none	silt and OM skins are 3fpf	N.A.	none	N.A.	N.A.	N.A.	N.A.	none	none	N.R.	N.R.	cw
Qdr - Delta Rim terrace	11-22	A2 or B	N.R.	N.R.	2fsbk	10	ssps	fr	h	L	none	silt and OM skins are 3fpf	N.A.	none	N.A.	N.A.	N.A.	N.A.	none	none	N.R.	N.R.	cw
eolian or overbank / fluvial gravels and sands/Rockland ash/fluvial gravels and sands	22-60	2Bt1	no matrix, all clay films		2fsbk	>75	sps	vfr	h	SCL	2dpf, 1fpf	2dpf - 10YR 5/6, 1fpf - 10YR 3/3	2dpf - 10YR 6/6, 1fpf - 10YR 4/4	none	N.A.	N.A.	N.A.	N.A.	none	none	N.R.	N.R.	cw
<~200 ka and > ca. 40 ka	60-71	2Bt2	2.5Y 6/6	2.5Y 7/4	2fsbk	50-75	sp	vfr	h	SCL	2dpf, 2ppf	2dpf - 10YR 3/4 , 2ppf - 10YR 2/2	2dpf - 10YR 4/4 , 2ppf - 10YR 3/4	none	N.A.	N.A.	N.A.	N.A.	none	none	N.R.	N.R.	cw
	71-80	3Bt	2.5YR 6/6	2.5YR 7/4	2fsbk	10-25	sp	vfr	h	L	2dpf, 2ppf	2dpf - 10YR 4/6, 2ppf - 10YR 4/4	2dpf - 10YR 5/6, 2ppf - 10YR 5/4	none	N.A.	N.A.	N.A.	N.A.	none	none	N.R.	N.R.	aw
	80-93	4Bt	2.5Y 5/4	2.5Y 7/4	2msbk	<10	ssps	vfi	h	L	2dpf, 1ppf	2dpf - 10YR 4/4, 1ppf - 10YR 3/4	2dpf - 10YR 5/4, 1ppf - 10YR 4/4	none	N.A.	N.A.	N.A.	N.A.	none	none	N.R.	N.R.	as
	93-117	5Bt	5Y 7/2	5Y 8/2	2msbk	0	sp	vfr	h	CL	2fpf, 1dpo	2fpf - 2.5Y 5/4	2fpf - 2.5Y 6/4	none	N.A.	N.A.	N.A.	N.A.	none	none	N.R.	N.R.	as
	117-143	6Bt1	2.5Y 8/2	2.5Y 7/4	2mcpr to 2msbk	0	ssps	fr	h	SL	2dpf, 1ppf	2dpf - 10YR 5/8, 1ppf - 7.5YR 5/6	2dpf - 10YR 6/6, 1ppf - 7.5YR 6/6	none	N.A.	N.A.	N.A.	N.A.	none	ST	N.R.	N.R.	gs
	143-193	6Bt2	5Y 7/2	5Y 8/1	3m-ccpr to 3m-csbk	0	ssps	fi	h	SL	2ppf, 3dpf	2ppf-7.5YR 6/8, 3dpf - 10YR 6/4	2ppf - 7.5YR 7/6, 3dpf - 2.5Y 7/3	2ppf	N.A.	N.A.	7.5YR 6/8	7.5YR 7/6	none	ST	N.R.	N.R.	gs
	193-202	6Bt3	no matrix, all clay films		3vccpr to 3vcsbk	0	sspo	vfi	h	SL	2ppf, 1dpf	2ppf-7.5YR 6/8, 1dpf - 10YR 6/4	2ppf - 7.5YR 7/6, 1dpf - 2.5Y 7/3	none	N.A.	N.A.	N.A.	N.A.	none	M	N.R.	N.R.	as
	202-227	7C	N.R.	N.R.	sg	>75	N.R.	N.R.	N.R.	N.R.	N.R.	N.R.	N.R.	groundwater stained and manganese accumulations	N.A.	N.A.	N.A.	N.A.	none	I	N.R.	N.R.	aw
	227-267	8C	N.R.	N.R.	sg	>76	N.R.	N.R.	N.R.	N.R.	N.R.	N.R.	N.R.		N.A.	N.A.	N.A.	N.A.	none	I	N.R.	N.R.	aw
Alluvial Fans
Site MV-267
	0-7	A	2.5Y 2.5/1	2.5Y 3/2	sg	<10	sopo	lo	lo	SL	nil	N.A.	N.A.	none	N.A.	N.A.	N.A.	N.A.	none	none	3vf, 3f	none	as
In a channel cut into the toe of Frazier fan (site MV-266) at the MFFR. Inset into site MV-262 (N4403592 E705586).	7-13	Bw1	2.5Y 2.5/1	2.5Y 3/2	1msbk	<10	sopo	fr	sh	L	nil	N.A.	N.A.	none	N.A.	N.A.	N.A.	N.A.	none	none	3vf, 3f	1vf, 1f, 1m	cw
1344 m	13-19	Bw2	10YR 2/1	2.5Y 3/2	v1msbk	10-25	sopo	vfr	so	L	nil	N.A.	N.A.	none	N.A.	N.A.	N.A.	N.A.	none	none	1vf, 1f	1vf	cw
alluvial fan / fluvial terrace	19-35	Bw3	2.5Y 2.5/1	2.5Y 4/2	1fsbk	25	sopo	vfr	so	L (SL?)	nil	N.A.	N.A.	none	N.A.	N.A.	N.A.	N.A.	none	none	2vf, 1f, 1m, v1vc	1vf	aw
eolian or overbank / fluvial gravels and sands	35-63	Bw4	2.5Y 3/2	2.5Y 4/3	1fsbk	50-75	sspo	vfr	so	L	nil	N.A.	N.A.	none	N.A.	N.A.	N.A.	N.A.	none	none	3vf, 2f	1vf	aw
< ca. 22 ka and > ca. 4ka	63-117	2C	2.5Y 3/3	2.5Y 4/4	v1fsbk	>75	sopo	vfr	so	L (SL?)	nil	N.A.	N.A.	none	N.A.	N.A.	N.A.	N.A.	none	none	2vf, 1f, 1m, v1vc	none	cw
	117-160	3C	2.5Y 3/3	2.5Y 4/3	sg	>75	sopo	lo	lo	LS (almost L)	nil	N.A.	N.A.	none	N.A.	N.A.	N.A.	N.A.	none	none	2vf, 1f, 1m, 1c	none	vs
	160-226+	4C	2.5Y 4/3	2.5Y 5/3	sg	>75	sopo	lo	lo	LS	1fcobr	N.A.	N.A.	none	N.A.	N.A.	N.A.	N.A.	none	none	2vf, 1f	none	N.A.
Site MV-266
Frazier fan inset into site MV-262 (N4403512 E705393).	0-9	Ap1 (disturbed)	2.5Y 2.5/1	2.5Y 4/2	v1vfgr	25	sspo	vfr	so	L	none	N.A.	N.A.	none	N.A.	N.A.	N.A.	N.A.	none	none	3vf, 3f	none	as
1351 m	9-17	Ap2	2.5Y 3/2	2.5Y 4/2	1fsbk	25	sspo	vfr	so	L	none	N.A.	N.A.	none	N.A.	N.A.	N.A.	N.A.	none	none	3vf, 2f	none	as
alluvial fan	17-27	Bw1	2.5Y 3/2	2.5Y 4/2	1vfsbk	25-50	sspo	vfr	so	SL	none	N.A.	N.A.	none	N.A.	N.A.	N.A.	N.A.	none	none	2vf, 2f, 1m, 1c,1vc	N.R.	cs
eolian or overbank / fluvial sands and gravels	27-47	Bw2	2.5Y 3/2	2.5Y 4/3	v1vfsbk	25-50	sspo	vfr	so	SL (L?)	none	N.A.	N.A.	none	N.A.	N.A.	N.A.	N.A.	none	none	2vf, 2f, 2m, 1c	none	cs
< ca. 22 ka and > ca. 4ka	47-58	Bw3	2.5Y 3/2	2.5Y 4/3	v1vfgr	50	sspo	vfr	so	LS	none	N.A.	N.A.	none	N.A.	N.A.	N.A.	N.A.	none	none	2vf, 1f, 1m, 1c	none	cw
	58-122	2Cox1	2.5Y 4/4	2.5Y 6/4	sg	>75	sopo	lo	lo	SL	none	N.A.	N.A.	none	N.A.	N.A.	N.A.	N.A.	none	none	2vf, 1f, 1m, 1c	none	cs
	122-158	2Cox2	2.5Y 4/3	2.5Y 6/4	sg	>75	sopo	lo	lo	LS	none	N.A.	N.A.	none	N.A.	N.A.	N.A.	N.A.	none	none	2vf, 1f, 1m, 1c	none	cs
	158-190+	2C	2.5Y 4/3	2.5Y 6/3	sg	>75	sopo	lo	lo	S	none	N.A.	N.A.	none	N.A.	N.A.	N.A.	N.A.	none	none	1vf, 1f	none	N.A.
Site MV-265
	0-5	Oi or A	5Y 2.5/1	5Y 3/2	1fsbk	50	sopo	vfr	so	SL	none	N.A.	N.A.	none	N.A.	N.A.	N.A.	N.A.	none	none	3vf, 3f	none	cs
Frazier fan. Inset into sites MV-266 and MV-267 (N4403148 E704919).	5-17	Bw1	5Y 2.5/1	5Y 3/2	1fsbk	25-50	sopo	vfr	so	L	none	N.A.	N.A.	none	N.A.	N.A.	N.A.	N.A.	none	none	3vf, 3f	none	cs
1373 m	17-28	Bw2	2.5Y 3/3	2.5Y 4/3	v1fsbk	>75	sopo	vfr	so	SL	none	N.A.	N.A.	none	N.A.	N.A.	N.A.	N.A.	none	none	3vf, 3f, 1m	none	cs
alluvial fan - swale	28-50	Bw3	2.5Y 3/3	2.5Y 5/3	sg	>75	sopo	lo	lo	LS	none	N.A.	N.A.	none	N.A.	N.A.	N.A.	N.A.	none	none	3vf, 3f, 1m, 1c	none	cw
fan gravels	50-86	Cox	5Y 4/3	5Y 6/3	sg	>75	sopo	lo	lo	S	none	N.A.	N.A.	none	N.A.	N.A.	N.A.	N.A.	none	none	2vf, 2f, 1,. 1c	none	gs
< ca. 22 ka and > ca. 4ka	86+	C	5Y 4/3	5Y 6/3	sg	>75	sopo	lo	lo	S	none	N.A.	N.A.	none	N.A.	N.A.	N.A.	N.A.	none	none	1vf, 1f, 1m, 1c	none	N.A.
Site MV-264
Frazier fan inset into sites MV-266 and MV-267 (N4403141 E704911).	0-5	Oi or A	2.5Y 2.5/1	2.5Y 3/2	v1msbk	50	sopo	vfr	so	L (SL?)	none	N.A.	N.A.	none	N.A.	N.A.	N.A.	N.A.	none	none	2vf, 2f	1vf	as
1374 m	5-18	Bw1	2.5Y 2.5/1	2.5Y 3/2	2fsbk	25-50	sopo	vfr	so	SL (L?)	none	N.A.	N.A.	none	N.A.	N.A.	N.A.	N.A.	none	none	3vf, 3f, 1m	1vf, 1f	cs
alluvial fan - bar	18-31	Bw2	2.5Y 3/3	2.5Y 4/4	v1vfgr	50-75	sopo	lo	lo	SL (L?)	none	N.A.	N.A.	none	N.A.	N.A.	N.A.	N.A.	none	none	3vf, 2f, 1m, 1c	none	cw
fan gravels	31-59	Bw3	2.5Y 3/3	2.5Y 5/4	sg	>75	sopo	lo	lo	SL	none	N.A.	N.A.	none	N.A.	N.A.	N.A.	N.A.	none	none	2vf, 2f, 1m, 1c, 1vc	none	cw
< ca. 22 ka and > ca. 4ka	59-106	Cox	2.5Y 4/3	2.5Y 6/3	sg	>75	sopo	lo	lo	LS	none	N.A.	N.A.	none	N.A.	N.A.	N.A.	N.A.	none	none	2vf, 1f, 1m, 1c, 1vc	none	gs
	106+	C	2.5Y 4/3	2.5Y 6/3	sg	>75	sopo	lo	lo	S	none	N.A.	N.A.	none	N.A.	N.A.	N.A.	N.A.	none	none	2vf, 1f, 1m, 1c, 1vc	none	N.A.
Site MV-262
	0-4	Oi	N.R.	N.R.	sg	>75	sopo	lo	lo	N.R.	none	N.A.	N.A.	none	N.A.	N.A.	N.A.	N.A.	none	none	n/a	n/a	as
Frazier Fan (N4402639 E704484)	4-9	A	10YR 2/2	10YR 3/2	sg	>75	sopo	lo	lo	SL	none	N.A.	N.A.	none	N.A.	N.A.	N.A.	N.A.	none	none	3vf, 3f, 1m	none	as
1416 m	9-34	Bw1	10YR 3/3	10YR 4/3	1vfsbk	>75	sopo	lo	lo	SL	none	N.A.	N.A.	none	N.A.	N.A.	N.A.	N.A.	none	none	3vf, 3f, 1m	none	cw
alluvial fan	34-58	Bw2	10YR 3/3	10YR 4/3	1fsbk	>75	sopo	vfr	so	SL	none	N.A.	N.A.	none	N.A.	N.A.	N.A.	N.A.	none	none	3vf, 3f, 1m	none	cw
fan gravels	58-77	Bw3	10YR 4/4	10YR 5/4	1fsbk	>75	sopo	vfr	so	L	silt skins on sand	N.A.	N.A.	none	N.A.	N.A.	N.A.	N.A.	none	none	3vf, 3f, 1m	none	cw
< ca. 22 ka and > ca. 4ka	77-107	Bw4 or Cox	10YR 4/4	10YR 5/4	1fsbk	>75	sopo	vfr	so	L	silt skins on sand	N.A.	N.A.	none	N.A.	N.A.	N.A.	N.A.	none	none	3vf, 2f, 1m, 1vc	none	cw
	107-143	2?	10YR 4/3	10YR 6/3	sg	>75	sopo	lo	lo	SL	silt skins on sand	N.A.	N.A.	none	N.A.	N.A.	N.A.	N.A.	none	none	3vf, 2f, 1m, 1c	none	cw
	143-164	2Coxb1	10YR 4/3	10YR 6/3	sg	>75	sopo	lo	lo	SL	silt skins on sand	N.A.	N.A.	none	N.A.	N.A.	N.A.	N.A.	none	none	3vf, 3f, 1m	none	cw
	164-186	2Coxb2	2.5Y 4/3	2.5Y 6/3	sg	>75	sopo	lo	lo	SL	silt skins on sand	N.A.	N.A.	none	N.A.	N.A.	N.A.	N.A.	none	none	3vf, 3f, 1m	none	cw
	186-223	2Coxb3	2.5Y 4/3	2.5Y 6/3	sg	>75	sopo	lo	lo	LS	none	N.A.	N.A.	none	N.A.	N.A.	N.A.	N.A.	none	none	3vf, 3f, 1m, 1c, 1vc	none	cs
	223-258+	3Bwb'	10YR 4/3	10YR 6/3	sg	>75	sopo	lo	lo	SL	none	N.A.	N.A.	none	N.A.	N.A.	N.A.	N.A.	none	none	3vf, 2f, 1m, 1c	none	n/a
Fluvial Terraces
Site MV-298
	2-0	O	2.5Y 4/2	2.5Y 5/2	sg	0	sopo	lo	lo	SL	nil	#N.A.	N.A.	none	N.A.	N.A.	N.A.	N.A.	none	none	N/A	N/A	as
floodplain Gray Eagle Creek (N4403706 E703588).	0-3	A	2.5Y 3/2	2.5Y 5/2	3flpl	<10	sopo	vfr	sh	SL	nil	N.A.	N.A.	none	N.A.	N.A.	N.A.	N.A.	none	none	2vf	3f, 2m	as
1357 m	3-15	Bw1	**N.R.	N.R.	2msbk	10-50	sopo	vfr	sh	SL	nil	N.A.	N.A.	none	N.A.	N.A.	N.A.	N.A.	none	none	2vf, 3f, 2m, 1c, 1vc	2f, 1m	aw
fluvial terrace	15-37	Bw2	2.5Y 4/3	2.5Y 6/3	sg (v1vfgr)	>75	sopo	lo	lo	SL	nil	N.A.	N.A.	none	N.A.	N.A.	N.A.	N.A.	none	none	3vf, 3f, 1m, 1c, 1vc	none	as
fluvial sands and gravels	37-165	C	2.5Y 4/3	2.5Y 6/3	sg	>75	sopo	lo	lo	SL	nil	N.A.	N.A.	none	N.A.	N.A.	N.A.	N.A.	none	none	2vf, 2f	none	N/A
< ca. 4 ka	70	color only	2.5Y 4/3	2.5Y 6/3	N.A.	N.A.	N.A.	N.A.	N.A.	N.A.	N.A.	N.A.	N.A.	none	N.A.	N.A.	N.A.	N.A.	N.A.	N.A.	N.A.	N.A.	N.A.
	165	color only	2.5Y 4/3	2.5Y 6/3	N.A.	N.A.	N.A.	N.A.	N.A.	N.A.	N.A.	N.A.	N.A.	none	N.A.	N.A.	N.A.	N.A.	N.A.	N.A.	N.A.	N.A.	N.A.
Site MV-261
	0-2	A	2.5Y 3/2	2.5Y 5/2	sg	0	sspo	lo	lo	LS	none	N.A.	N.A.	N.A.	N.A.	N.A.	N.A.	N.A.	none	none	3vf,3f	none	cs
modern floodplain MFFR (N 4406292 E701970).	2-13	Bw1	2.5Y 3/2	2.5Y 5/2	sg	0	sspo	lo	lo	LS	none	N.A.	N.A.	N.A.	N.A.	N.A.	N.A.	N.A.	none	none	3vf, 3f	none	cs
1318 m	13-42	Bw2	10YR 4/2	10YR 5/3	1fsbk	0	sopo	vfr	so	SL	none	N.A.	N.A.	N.A.	N.A.	N.A.	N.A.	N.A.	none	none	2vf	none	cs
floodplain	42-68	Bw3	2.5Y 3/2	2.5Y 5/2	2fsbk	0	sspo	vfr	so	SL	none	N.A.	N.A.	N.A.	N.A.	N.A.	N.A.	N.A.	none	none	1vf, 1f	none	cw
fluvial sands and pebbles	68-150+	2C	2.5Y 3/2	2.5Y 5/2	sg	>75	sopo	lo	lo	S	none	N.A.	N.A.	N.A.	N.A.	N.A.	N.A.	N.A.	none	none	1vf, 1f	none	N.A.
< ca. 4 ka
Site MV-297
	2-0	O	10YR 3/3	10YR 4/3	sg	0	sopo	lo	lo	S	none	N.A.	N.A.	none	N.A.	N.A.	N.A.	N.A.	none	none	none	none	as
floodplain terrace MFFR (N4406267 E702673).	0-7	A	10YR 4/2	10YR 6/3	1vfgr	<10	sspo	vfr	so	SL	none	N.A.	N.A.	none	N.A.	N.A.	N.A.	N.A.	none	none	2vf	2vf, 1f, 1m	cs
1320 m	7-18	Bw1	10YR 3/3	10YR 6/3	1fsbk	<10	sspo	vfr	so	SL	none	N.A.	N.A.	none	N.A.	N.A.	N.A.	N.A.	none	none	3vf, 1f, 1m	2vf, 1f, v1m	aw
fluvial terrace	18-27	Bw2	10YR 3/2	10YR 4/2	2fsbk	<10	sspo	vfr	sh	S	none	N.A.	N.A.	none	N.A.	N.A.	concretions 10YR 4/4	concretions 10YR 6/4	none	none	2vf, 1f, 1m, 1c, 1vc	2vf, 1f, 1m	aw
fluvial sands and gravels	27-46	2Bwb1	2.5Y 3/2	2.5Y 5/2	2fsbk	25-50	ssps	vfr	sh	L	none	N.A.	N.A.	none	N.A.	N.A.	N.A.	N.A.	none	M	2vf, 1f, 1m, 1c, 1vc	2vf, 1f	aw
ca. 4 ka from 150-210 cm	46-64	3Bwb2	2.5Y 4/2	2.5Y 6/2	2fsbk	<25	sspo	vfr	sh	S	none	N.A.	N.A.	none	N.A.	N.A.	10YR 5/4, 10YR 4/6	10YR 6/6, 10YR 5/6	none	M	1vf, 1f, 1m	3vf, 2f, 1m	ai
	64-77	4Ab3-Bwb3	2.5Y 4/2	2.5Y 6/1	2fpl-2f-msbk-abk	<10 (small pebbles)	sps	vfr	sh	S	none	N.A.	N.A.	none	N.A.	N.A.	5YR 4/6	5YR 5/8	none	M	3vf, 1f, 1m, 1c	3vf, 2f, 2m, 1c	cw
	77-103	5Bwb4	2.5Y 3/2	2.5Y 5/2	2c-msbk-abk	<10	sps	vfr	h	SL	1fcobr (OM?)	N.A.	N.A.	none	N.A.	N.A.	10YR 5/6	10YR 6/6	none	M	1vf, 1f, 1m	1vf, 1f, 2m	cw
	103-120	6Bwb5 (6C?)	2.5Y 4/2	2.5Y 6/2	2msbk	10-25	sspo	fr	h	SL	none	N.A.	N.A.	none	N.A.	N.A.	N.A.	N.A.	none	M	1vf, 1f	1vf, 1f	aw
	120-150	7C	2.5Y 3/2	2.5Y 5/2	1v-vfsbk-gr	>75	sopo	vfr	sh	S-LS	none	N.A.	N.A.	none	N.A.	N.A.	N.A.	N.A.	none	none	2vf, 2f, 1m	1vf	aw
	150-210	8C	2.5Y 3/2	2.5Y 6/2	2msbk	<10	sopo	fr	sh	S	none	N.A.	N.A.	none	N.A.	N.A.	10YR 5/6, 10YR4/6	10YR 6/6, 10YR 5/6	none	M	1vf, 1f	1vf, 1f	aw
	210-300	9C	2.5Y 3/3	2.5Y 4/2	sg	>75	sopo	lo	lo	S	none	N.A.	N.A.	none	N.A.	N.A.	N.R.	N.R.	none	M	1vf, 1f, 1m	none	aw
	300+	R	Mohawk Lake Deposits, same as in the Mohawk Cliffs section just downstream
Note: NA—Not applicable; ND—no data; NR—not recorded; OM—Organic Matter.
†Nomenclature as described in Soil Science Division Staff (2017) as modified by Birkeland (1999).
§CaCO3 stage nomenclature as defined by Gile et al. (1966) as modified by Machette (1985).
#Silica stage nomenclature from Taylor (1986).
††Does not slake in water. Infer presence of silica. Mn throughout and gleyed in part. Structure almost prismatic.
Explanation of abbreviations used in soil descriptions (from Soil Science Division Staff, 2017)
Colors: From Munsell Soil Color Chart; n.d., not determined.
Structure: grade: v1—very weak, 1—weak, 2—moderate, 3—strong; size class: vf—very fine, f—fine, m—medium, c—coarse; type: gr—granular, pl—platy, abk—angular blocky, sbk—subangular blocky, cpr—columnar prismatic, pr—prismatic, sg—single grain, m—massive; –> indicates grading to
Consistence: wet: stickiness: so—nonsticky, ss—slightly sticky, s—sticky, vs—very sticky; wet: plasticity: po—nonplastic, ps—slightly plastic, p—plastic, vp—very plastic. . moist: lo—loose, vf—very friable, fr—friable, fi—firm, vfi—very firm, efi—extremely firm, — ,dry: lo—loose, so—soft, sh—slightly hard, h—hard, vh—very hard, eh—extremely hard.
Textural classes: S—sand, LS—loamy sand, SL—sandy loam, L—loam, SiL—silt loam, SiCL—silty clay loam, CL—clay loam, SCL—sandy clay loam.
Clay films: amount: 0—none, 1—few, 2—common, 3—many; distinctness: f—faint, d—distinct, 3—prominent; location: pf—on ped faces, br—bridges between grains, co—coats grains, po—pores, cobr—colloids and bridges, n.d.—not determined.
Roots and Pores: amount: v1—very few, 1—few, 2—common, 3—many; size: vf—very fine, f—fine, m—medium, c—coarse, vc—very coarse.
Effervescence: ES—effervesce slightly, EV—effervesce violently
Cementation: cw—weakly cemented, cm—moderately cemented, cs—strongly cemented, ci—indurated.
Lower boundary: distinctness: a—abrupt, d—distinct, c—clear, g—gradual; shape: smooth, w—wavy; i—irregular; n.e.—not exposed.
